# Supplementary material for: Fe–oxy adducts of heme–Aβ and heme–hIAPP complexes: intermediates in ROS generation
Source: Royal Society of Chemistry journal article supplement (doi:10.1039/c6mt00214e), 2016-01-01
Supplement: c6mt00214e1.pdf [file c6mt00214e1.pdf]

## **Supporting Information**

### **Fe-Oxy Adducts of Heme-A $\beta$ and Heme-hIAPP Complexes: Intermediates in**

### **ROS Generation**

Manas Seal<sup>a</sup>, Soumya Mukherjee<sup>a</sup> and Somdatta Ghosh Dey<sup>a\*</sup>

Department of Inorganic Chemistry, Indian Association for the Cultivation of Science,

Jadavpur, Kolkata 700032, India

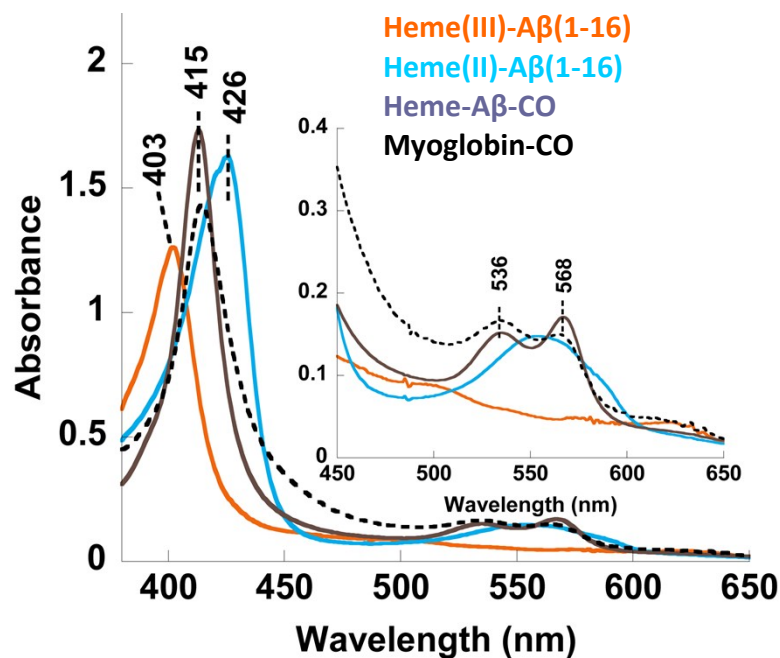

**Figure S1.** Absorption spectra of oxidized, reduced and CO complex of heme-A $\beta$ (1-16) in DMF and the CO complex of Myoglobin in DMF.

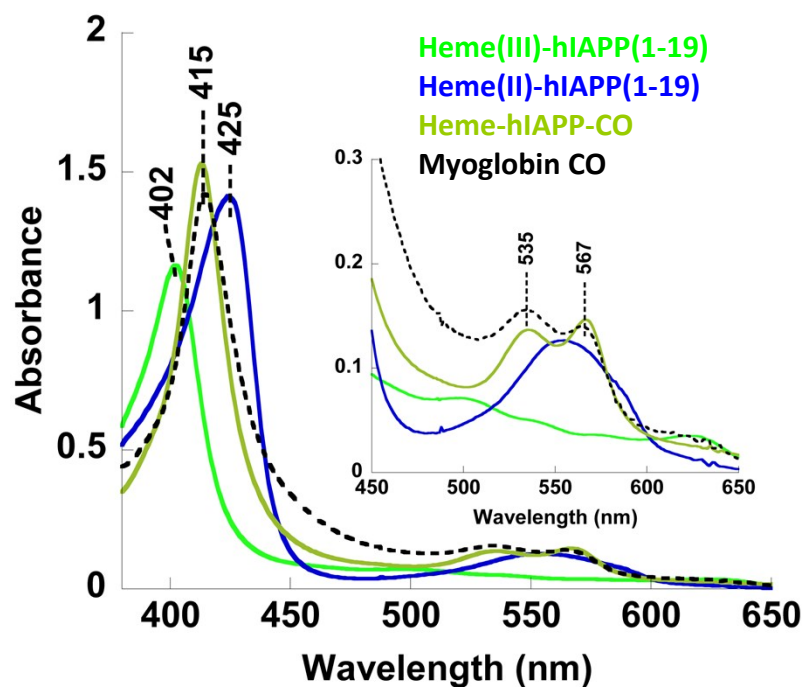

**Figure S2.** Absorption spectra of oxidized, reduced and CO complex of heme-hIAPP(1-19) in DMF and the CO complex of Myoglobin in DMF.

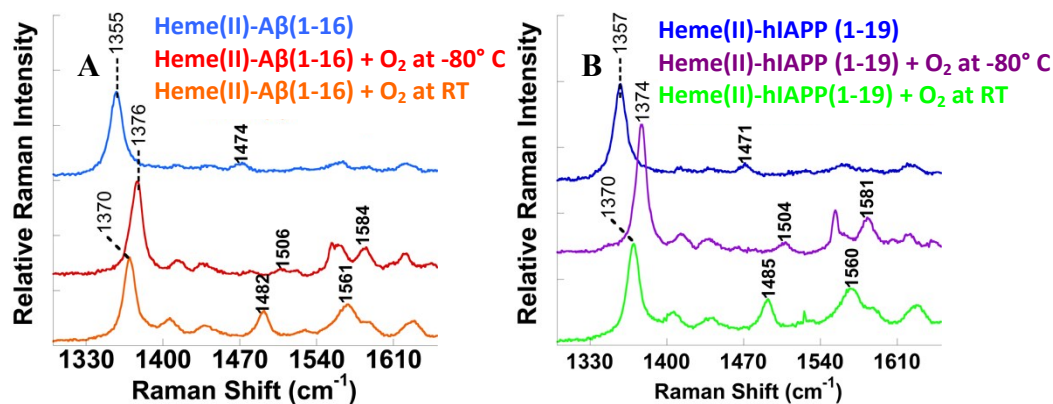

**Figure S3.** (A) High frequency rR spectra of reduced heme-Aβ(1-16), blue and reduced heme-Aβ(1-16) in presence of O<sub>2</sub> at room temperature and low temperature, (A) High frequency rR spectra of reduced heme-hIAPP(1-19), blue and reduced heme-hIAPP(1-19) in presence of O<sub>2</sub> at room temperature and low temperature.

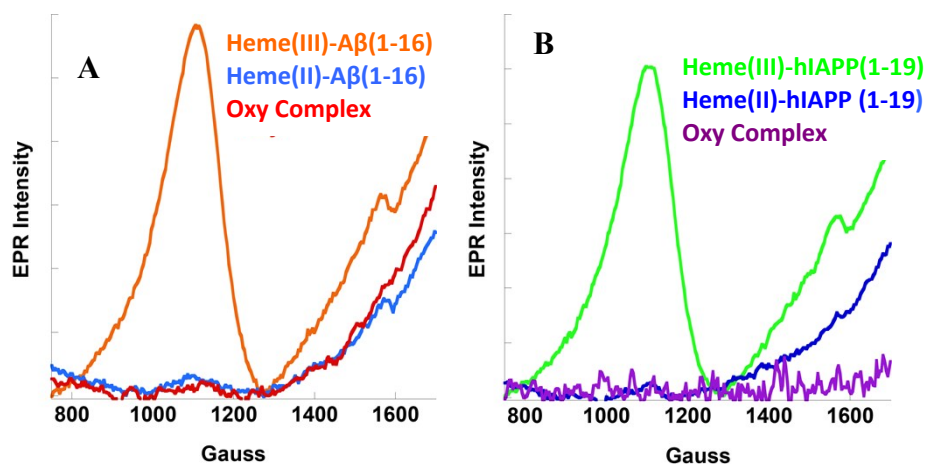

**Figure S4.** EPR spectra of oxidized, reduced and oxy complexes of (A) heme-Aβ(1-16) and (B) heme-hIAPP(1-19) at 77K.
